# Supplementary material for: Mapping Changes in Settlement Number and Demography in the South of Israel from the Hellenistic to the Early Islamic Period
Source: publisher site journal article supplement (doi:10.1515/opar-2025-0065), 2025-01-01
Supplement: Supplementary file 1 [file j_opar-2025-0065_suppl_001.xlsx]

## Sheet: Sheet1
The dating in the table is according to the periods used by Israeli archaeology and the archaeological survey of Israel. The comments are interesting notes from within the surveys themselves, and various mistakes which were encountered while collating the data. Hellenistic Sum, Roman Sum, Byzantine Sum, Early Islamic Sum are the categories for the entire respective periods. This was calculated by…
Map Number	Name	Persian Sum	Persia-Hellenistic	Early Hellenistic	Hellenistic only	Hellenistic Sum	Late Hellenistic	Hellenistic-Roman	Early Roman	Roman-Nabatean	Roman Only	Roman Sum	Early-Mid Roman	Mid Roman	Mid-Late Roman	Late Roman	Roman-Byzantine	Early Byzantine	Byzantine only	Byzantine Sum	Late Byzantine	Byzantine-Early Islamic	Early Islamic only	Early Islamic Sum	Umayyad	Islamic	Roman Continuing into the Byzantine	Byzantine Continuing into the Early Islamic	Comments
114	Mivtahim	0			1	1					5	5							34	34			1	1			4	1
125	Urim	4			10	10			17		77	77				59			120	120			19	19			46	16	There was difficulty in differentiating between Byzantine and Early Islamic pottery. Sites may have been abandoned in second half of 7th century CE.
127/128	East and West Beer Sheva	6			13	13					32	32							358	358			66	66			31	56	The only sites which were able to be categorised by sub-periods from the Byzantine period were 11 sites that were defined as Late Byzantine.
139	Nahal Yattir	7			6	6					30	30							89	89			13	13			26	10	Continuation of settlement activity from the Byzantine to the Early Islamic (eg sites 216 and 211). Some sites were not identified and written correctly = 205(02/3) written as Persian fortress but not written in the summary table of the periods.
140	Qasif	0			5	5					15	49					34		46	80			8	8	6	2	36	4	From some of the Byzantine sites, potttery was identified as continuing into the first decades of the Early Islamic
129	Ze’elim	1			18	26		8	4		36	120				1	76		153	267		38	71	109			93	69	Because 4 of the Hellenistic-Roman sites appear in the Early Roman, the number of Hellenistic-Roman sites was changed from 8 to 12 and added 4 sites to the Hellenistic to avoid duplication.
131	Nahal Secher	1			0	0					15	15				15			47	47			17	17			13	11	In the text, it says there are 14 Late Roman sites, in the summary table of the periods it is written that there are 15. With the Early Islamic, it is written there are 16 in the text, yet in the table, 17 are written.
132	Nahal Bekaa	0			0	0					21	21				21			53	53			15	15			21	15	Continuation of settlement activity from the Byzantine to the Early Islamic (2, 9, 15, 17, 20, 28, 30, 41, 45, 46, 52, 56, 59, 62). It is written that there are 15 Early Islamic, but only 14 site numbers are provided in the explanation.
143	Khirbet Aroer	0			1	1					8	8				2			16	16			2	2			8	2
144	Tell Malhata	0			1	1					8	8				4			67	67			4	4			7	4	Possibly some of the Byzantine sites continued into the beginning of the Early Islamic, as was recently suggested for other areas. However, there is no clear indication of this in this survey map.
145	Khirbet Uza	0			3	3					3	7					4		34	38			5	5			4	5
146	Nahal Hemer	0			1	1						2					2		5	7			3	3			2	3
159	Revivim	0			0	0			6		23	23				21			76	76			6	6			17	5	Not all the sites are indicated in the survey map, for example the summary map of the Roman period is missing sites 5, 9, 28 and 59.
160	Maasaf Negev	0			0	0			5		12	12				9			62	62			3	3			11	3	Continuation of settlement activity from the Byzantine to the Early Islamic
173	Yeruham Ridge	0			0	0			5	3	7	7				1			53	53			7	7			4	3	Magness' analysis of the pottery of the Negev has brought her to suggest that there was no destruction of the sites in the Arab conquest, rather there was continuation here (Magness 2003:118-190).
174	Dimona	0			0	0			1		6	6				1			46	46			2	2			3	1	Settlements were abandoned in the Early Islamic, may have become pastoralists.
153	Holot Agur Southwest	0			0	0					0	0							2	2			0	0			0	0
154	Holot Agur Southeast	0			1	1	1				3	9					6		53	59			3	3			8	3	2 sites identified as Roman only were also listed as Roman-Byzantine, so decreased number of Roman only sites by 2 to 3 avoid duplication.
161	Rehovot in the Negev	0			0	0				2	2	2							10	10			0	0			1	0
162	Givat Hayil	0			1	1					3	3							64	64			11	11			3	11	Complete lack of pottery sherds and coins of the Early Islamic/Umayyad period, suggests abandonment of Saadon in the beginning of the 7th century CE.
163	Mashabe Sadeh	0			0	0			18		20	20				17			81	81			1	1			14	1	When examining Roman sites which continued into the Byzantine, only sites that were defined as Late Roman (i.e. existed in the 2nd and 3rd centuries CE) were examined.
164	Nahal Revivim	0			0	0			4		14	14				4			62	62			4	4			10	4	Mistake in the text: written that only 2 Early Islamic sites originate from the Byzantine, but in the summary table of the periods can see 4 sites are a continuation from the Byzantine to the Early Islamic. Further mistake: written that only 9 Byzantine sites originate from the Roman, but in the table can see 10 sites continue from the Roman to the Byzantine.
177	Yeruham	0			0	0					0	0							7	7			2	2			0	2	Mistake in the summary table for the periods: site 31 is not Early Islamic but site 41 is Early Islamic.
178	Har Zayyad	0			0	0			3		3	3							19	19			1	1			1	1
155	Nessana	0			2	2					10	10							65	65			8	8	6		10	7
165	Shizaf	0			0	0			8		43	43				6			90	90			6	6			38	6	Mistakes in the number of Roman sites. In the summary table there are 41 Roman sites, when counting individually and eliminating duplicates there are 43 Roman sites.
166	Shivta	1			0	0					100	100							181	181			4	4			59	2
167	Sde Boqer West	3			0	0				12	13	13							44	44			6	6			4	3	Continuation of settlement activity from the Byzantine to the Early Islamic
168	Sde Boqer East	1			0	0				6	9	9							45	45			9	9			3	2	Continuation of settlement activity from the Byzantine to the Early Islamic
183	Maale Aqrabim	0			0	0					8	8							9	9			1	1			7	1
156	Beerotayim	2			0	0				1	5	5							19	19			22	22	5	17	4	6	Majority of the Early Islamic sites did not have any remains of buildings, suggesting they were nomadic pastoralists. Although the number of sites is greater than the number of Byzantine sites, it represents a smaller population.
169	Har Raviv	0			0	0					8	8							27	27	1		2	2			8	2	Abandonment of settlements in the 7th century CE.
170	Givat Kevuda	0			0	0					10	10							45	45			4	4			9	4	Abandonment of settlements in the 7th century CE.
171	Odoba	3			28	28				28	163	163							162	162			9	9		13	67	7	13 Islamic sites of which 5 are Early Islamic and 7 Late Islamic, but when going over all the sites, 9 were Early Islamic.
172	Har Akav	0			0	0			1		2	2							3	3			0	0			0	0	Abandonment of settlements in the 7th century CE.
187	Nahal Hatzeva	0			0	0					5	5				3			5	5			2	2			2	1
193	Har Ezoz West	0			0	0					2	2							0	4		4	0	4			2	4	Many agricultural lands in the riverbeds and in wadis dated to the Byzantine and Early Islamic period
194	Har Ezoz	0			0	0				4	14	14							83	83			25	25	9	16	12	17	Continuation of settlement activity from the Byzantine to the Early Islamic in some places.
195	Har Kemer	0			0	0				25	65	65				15			124	124			19	19		19	40	15	Abandonment of settlements in the 7th century CE.
196	Har Nafha	0			0	0				42	74	74							233	233			12	12			38	7	Difficulty in differentiating between Early Islamic and Byzantine sites. Some sites are incorrectly written; 33, 38, 49, 93, 106, 113, 158, 161, 174, 208, 215, 225 = Byzantine pottery not identified; 171 = Nabatean pottery not noted; 173 = Nabatean and Roman pottery not noted; 115 = meant to be Roman-Byzantine; 179 =Early Islamic pottery not noted, 236 = Nabatean and Byzantine pottery not noted.
212	Nahal Massor	0			0	0				2	2	2							2	2	2		3	3			1	2
213	Hatzeva	0			0	0					2	2								0			3	3			0	0	Did not identify any Byzantine sites but wrote that after the Byzantine period, mining activity in Wadi Paran ceased and settlements were abandoned.
198	Har Hamran Southwest	0			0	0				11	14	14				2				118		118		118			9	118	Did not differentiate at all between Byzantine and Early Islamic sites.
199	Har Hamran Southeast	0			0	0				26	40	40								107		107		107			12	107	Did not differentiate at all between Byzantine and Early Islamic sites.
200	Mitzpe Ramon Southwest	0			0	0				35	52	52				17				112		112		112			21	112	Difficulty in differentiating between Early Islamic and Byzantine sherds.
201	Mitzpe Ramon	0			0	0				25	34	59					25		53	79		1		1			32	1	According to the summary map there are 53 Byzantine only sites, not 35. Decrease in settlement activity in the Early Islamic
214	Har Ardon					0				1	1	1								0				0			0	0
216	Sapir Centre					0				2	8	8							13	13			0	0			8	0
217	Ein Yahav				0	0					0	1					1		1	2			11	11		11	1	2
202	Rosh Hursha				0	0					18	18								43		43		43			18	43
203	Har Ramon	0			0	0				3	10	10							27	27			39	39			1	0
204	Ramon Crater				0	0				12	14	38					24		95	119			19	19			31	14
219	Har Moshe	0			0	0			4	2	4	4							0	0			0	0			0	0
220	Sheluchat Omer	0			0	0				1	1	1							1	1			0	0			0	0	The Roman-Byzantine site does not appear in the site gazeteer, it appears as Nabatean-Roman (site 18)
206	Har Meara	0			0	0					0	10					10			43		33		33			10	33	The summary maps are incorrect, the numbers were taken from the detailed site gazeteer themselves.
207	Har Lutz	0			0	0				1	5	8					3			52		49		49			5	49	The summary maps are incorrect, the numbers were taken from the detailed site gazeteer themselves.
224	Har Sagi Northwest	0			0	0					0	0								12		12		12			0	12
225	Har Sagi Northeast	0			0	0				10	21	21								95		95		95			12	95	Sherds found typical for the Late Byzantine and the beginning of the Early Islamic period.
238	Nahal Paran					0						1					1			1				0			1	0	Only 12 sites were found. The small number of sites is connected to the shifting topography of the desert.
234	Mishor Paran					0					2	2							8	8				0			2	0
255	Yotvata				3	3				4	8	8							4	4	1		15	14			2	2	On the map, there are 4 Byzantine sites but in the detailed site gazeteer, there were only 3 (sites 1, 15 and 23). For tha Nabatean, there are 4 on the map, but 3 in the sites explanation (sites 16, 17 and 18). For the Early Islamic, there are 13 on the map, but 14 in the site gazeteer (3, 6, 8, 9, 10, 12, 14, 15, 16, 18, 21, 23, 24, 26).
256	Sayarim Valley					0					7	19					12		11	24		1	1	2			17	1	1 site has Roman Byzantine which was not classified 11 (59/2), 21(48/1) has Nabatean which was not classified.
257/259	Timna Cliffs and Har Sagi				12	12			10		60	60							46	46			89	89			24	24	Mistake in the chronological site list of the Arabah survey: 30 and 10 are only written in the general list of the Roman sites. In addition, a few sites were classified wrongly (19(186), 8(228), 35(412), 58(54)) as no Byzantine, and one classified wrongly as no Roman (56 (62)) but only 3 byzantine are actually missing (19(186), 8(228), 35(412)).
258	Saltpeter Yotvata					0					4	4								0			1	1			0	0
260	Beer Ora West					0					3	3							2	2			8	8			1	2
261	Beer Ora East					0					2	2							2	2			2	2	2		0	1
262	Har Hezkiyahu					0						0								0			2	2			0	0
263	Har Amir				1	1					5	5							3	3			7	7			2	1
264	Ein Evrona					0						0								0				0			0	0	No sites
265	Ein Netafim					0						0							1	1			5	5			0	1
266	Eilat				3	3			1		2	2							3	3			12	12			1	2
SUM		29	0	0	110	118	1	8	87	258	1193	1399	0	0	0	198	198	0	2964	3775	4	613	610	1222	28	78	877	936
																											0.626876	0.765957
